# Supplementary material for: High-throughput evaluation of T7 promoter variants using biased randomization and DNA barcoding
Source: PLoS One. 2018 May 7;13(5):e0196905. doi: 10.1371/journal.pone.0196905 (PMC5937735; doi:10.1371/journal.pone.0196905)
Supplement: S2 Table — This table shows the primer list for construction of DNA fragments used for translational assay in PURE system. (XLSX) [file pone.0196905.s006.xlsx]

## Sheet: Sheet1
Forward/Reverse	Primer name	Primer sequence
Forward primer	Forward_for_original sequence	GGCCTAATACGACTCACTATAGGGAGAAATCATAAAAAATTTA
	Forward_for_#7827	GGCCATATACGACTCACTATAGGGAGAAATCATAAAAAATTTA
	Forward_for_#7797	GGCCTAATACGACTCGCTATAGGGAGAAATCATAAAAAATTTA
	Forward_for_#7764	GGCCTAATACGACTCGGTATAGGGAGAAATCATAAAAAATTTA
	Forward_for_#7595	GGCCAGGTACGACTCACTATAGGGAGAAATCATAAAAAATTTA
Reverse primer	Reverse_for_LacZ	GTTATTGCTCAGCGGTTAGCGGCCGCATAGGCC
